# Supplementary material for: HIV-activated human plasmacytoid DCs induce Tregs through an indoleamine 2,3-dioxygenase–dependent mechanism
Source: JCI journal article supplement (doi:10.1172/jci34823), 2008-09-04
Supplement: sd1 [file 1]

Suppl. Figure 1

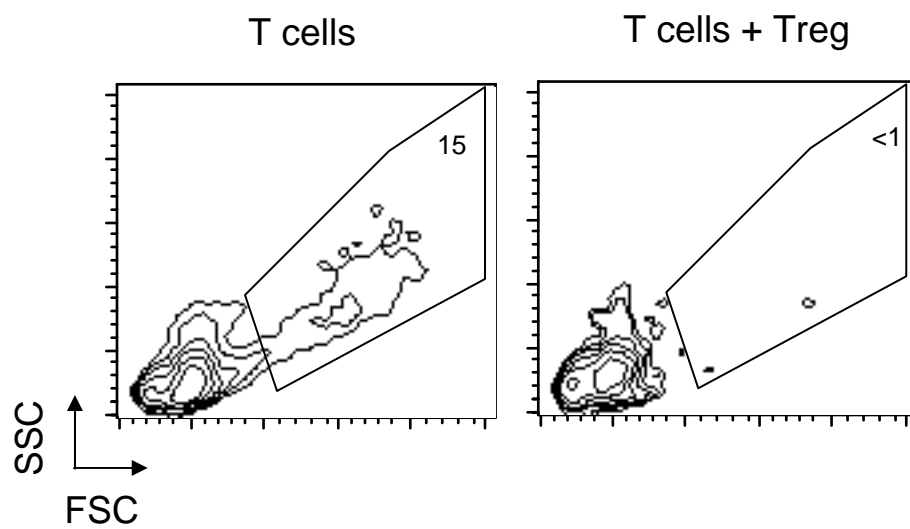

Suppl. Figure 2

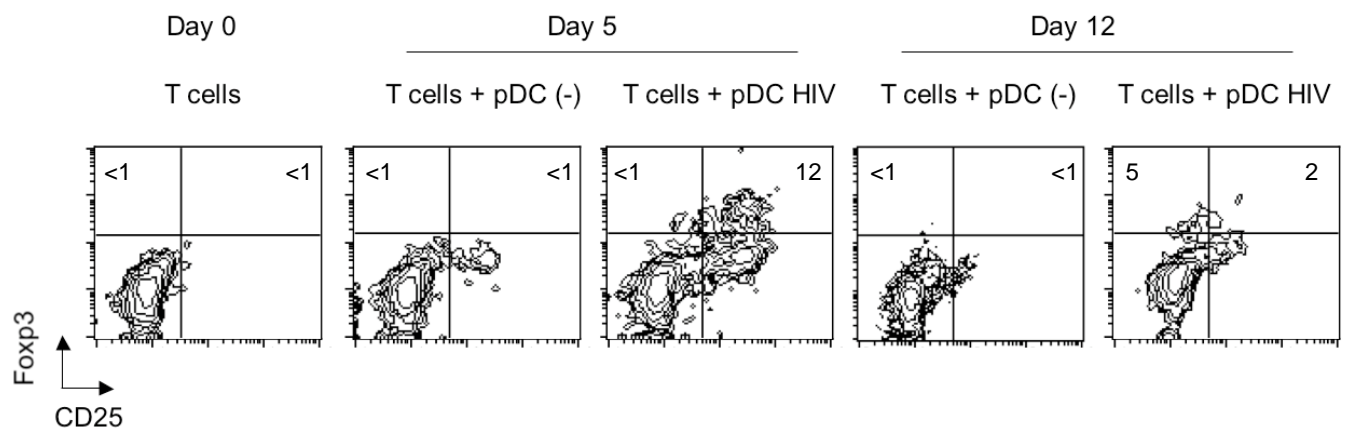

Suppl. Figure 3

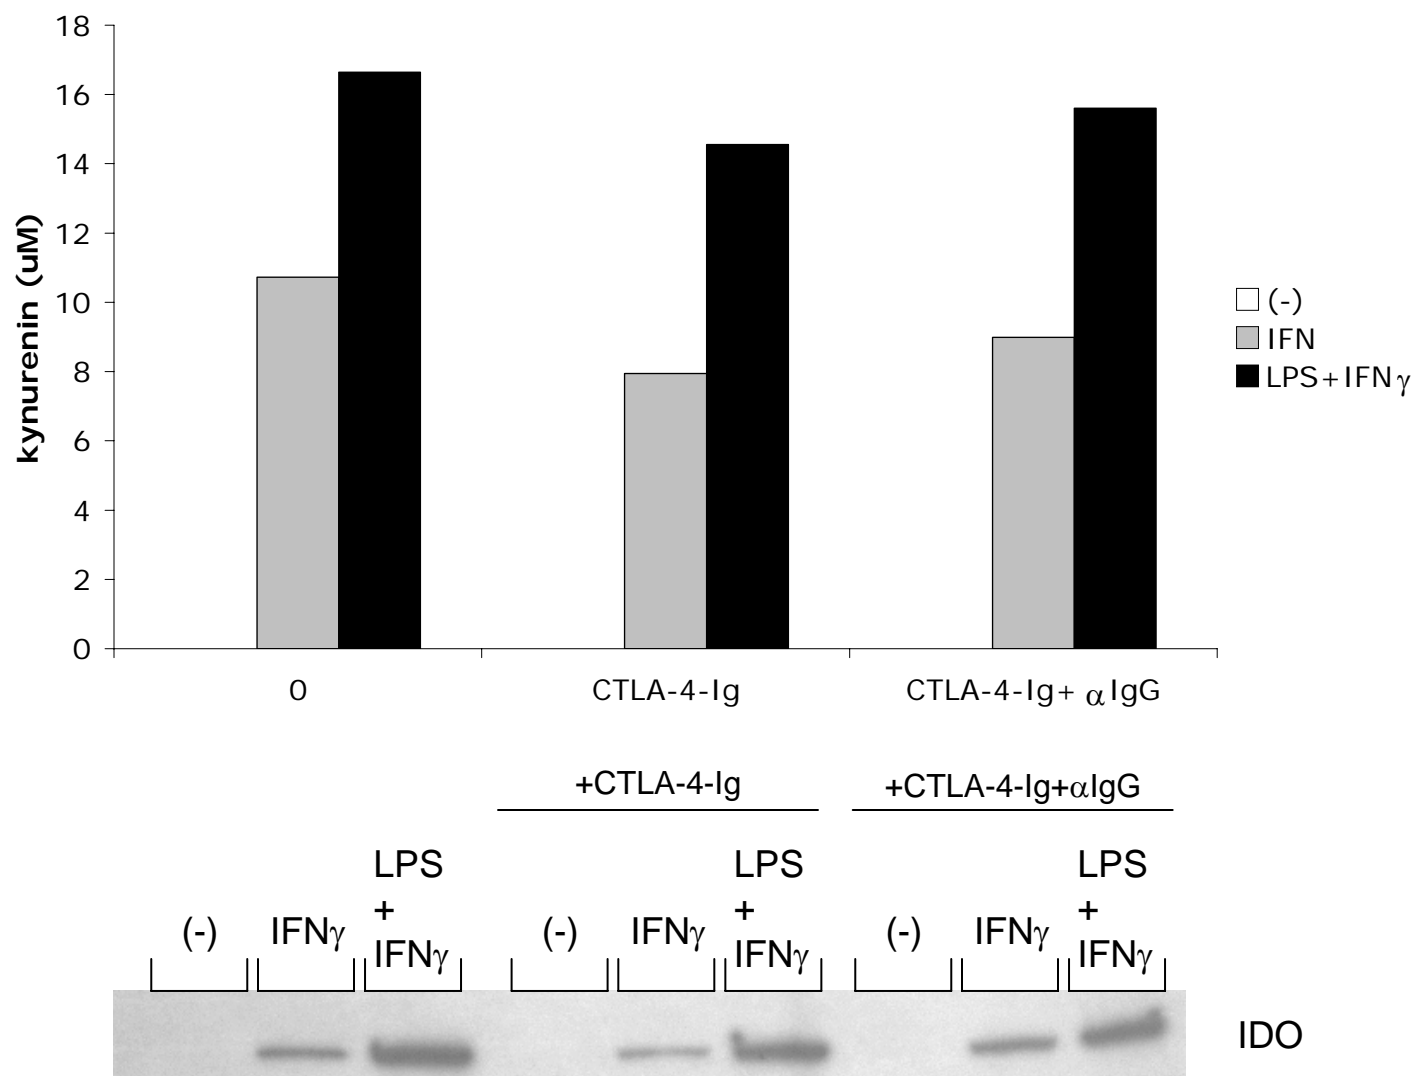

Suppl. Figure 4

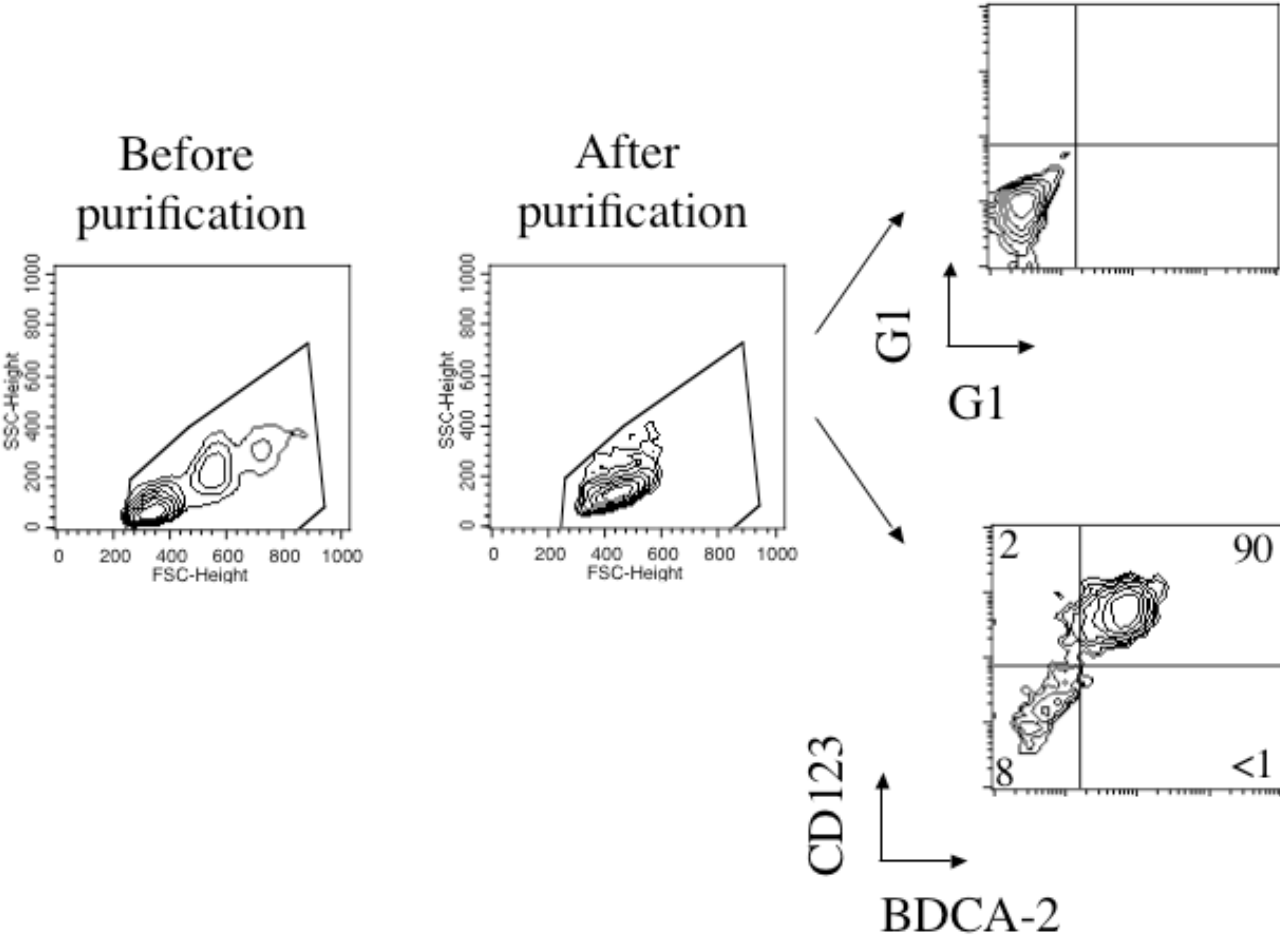

Suppl. Figure 5

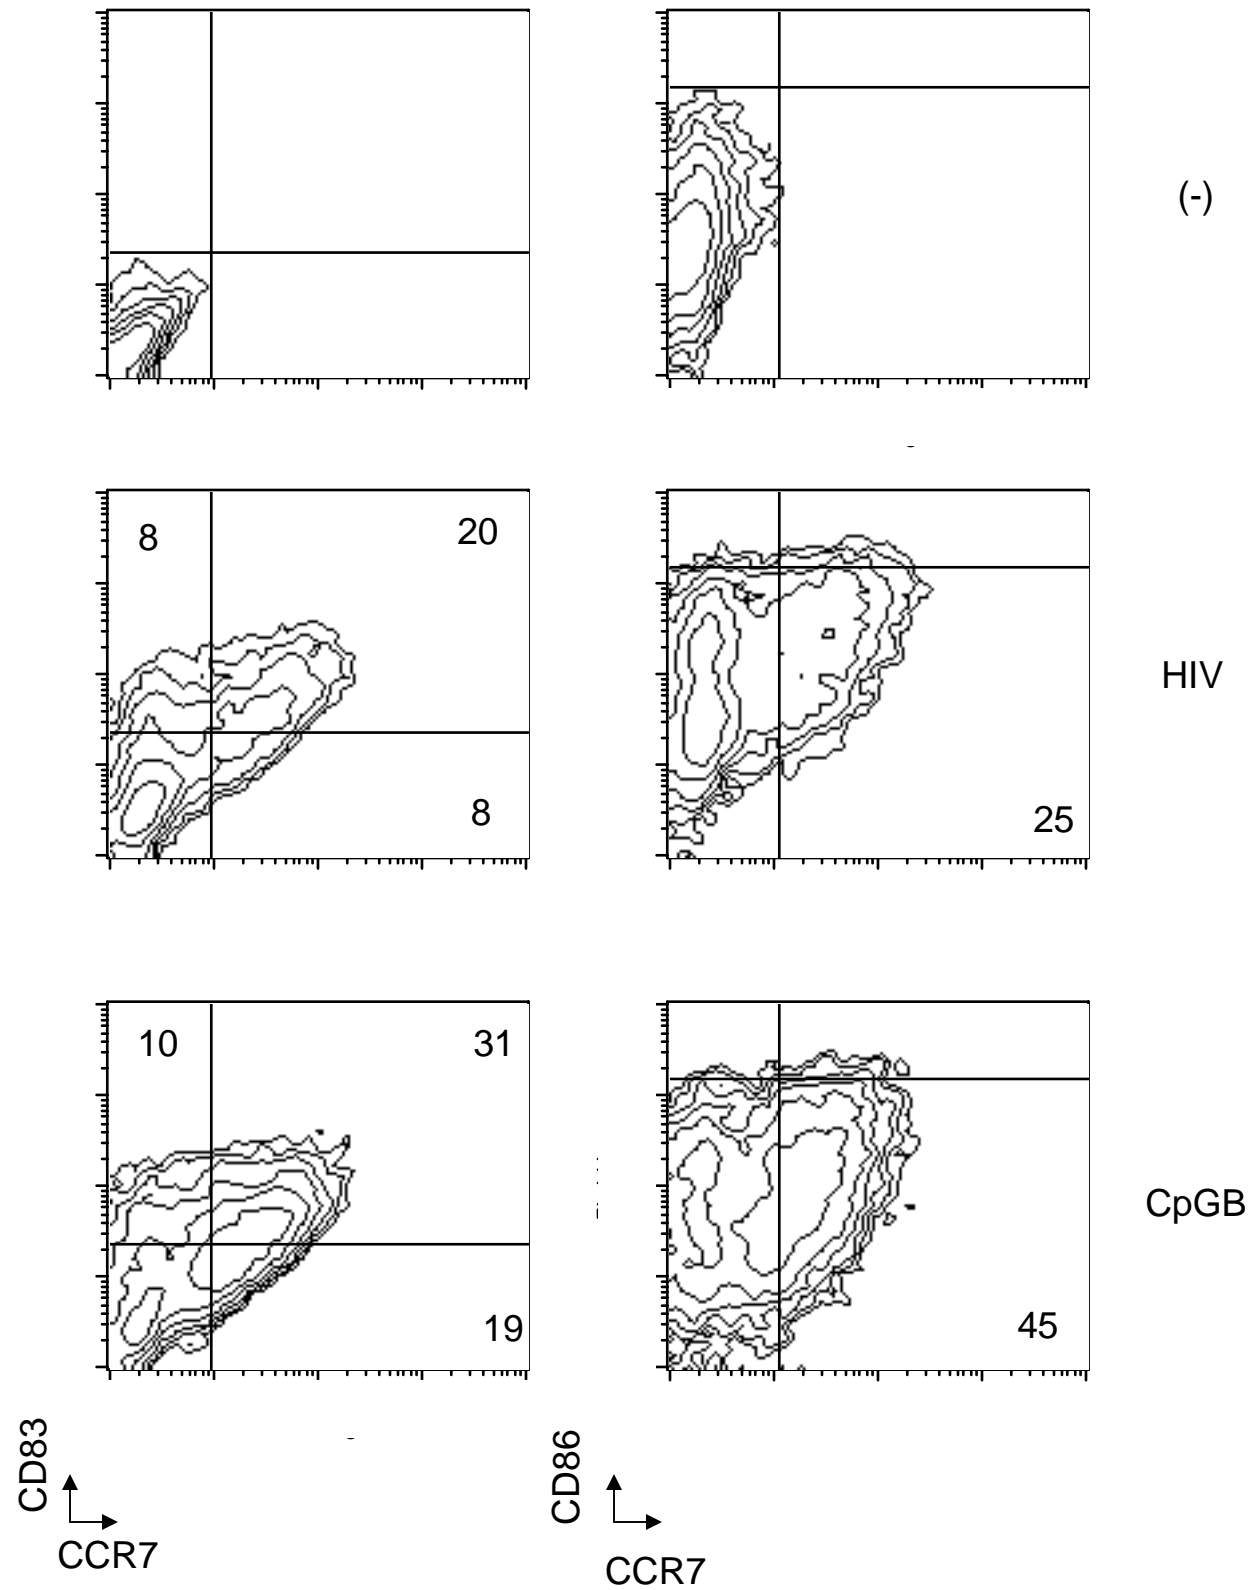

## SUPPLEMENTARY FIGURES

### Supplementary Figure 1:

#### **Inhibition of blast formation by pDC-primed Treg.**

Purified pDC were activated by AT-2 HIV and then used to stimulate naïve CD4<sup>+</sup> T cells. The Treg population was then added (right plot) at a 3:1 ratio to naïve T cells with concurrent anti-CD3/ CD28 stimulation. The left plot represents control naïve T cells that did not receive Treg. Blast formation was monitored by flow cytometry at day 4 as cells with higher FSC-SSC measurements (percentages of cells in the gated area are indicated).

### Supplementary Figure 2:

#### **Kinetics of expression of Foxp3 and CD25 by T cells upon stimulation by HIV-activated pDC.**

Purified pDC were activated by AT-2 HIV and then used to stimulate naïve CD4<sup>+</sup> T cells. Foxp3 and CD25 expression was monitored by flow cytometry at day 0, at day 5, and at day 12. T cells stimulated by unactivated pDC are shown as a control. Percentages of cells in the upper quadrants are indicated.

### Supplementary Figure 3:

#### **Expression of IDO by moDC upon incubation with IFN $\gamma$ , LPS+ IFN $\gamma$ , and CTLA-4-Ig.**

moDC were incubated with 1000 IU/ ml IFN $\gamma$ , or 1000 IU/ ml IFN $\gamma$  with 250ng/ml LPS. CTLA-4-Ig (1ug/ml) was added alone or with a cross-linking anti-IgG antibody (10ug/ml). After 48h, the kynurenine content was measured spectrophotometrically, and

IDO expression was detected by Western Blot. moDC activated by IFN $\gamma$  and IFN $\gamma$  with LPS express IDO, but CTLA-4-Ig does not by itself induce IDO and does not enhance IDO expression upon moDC activation.

Supplementary Figure 4:

**Purification of pDC.**

pDC were purified by positive selection using magnetic beads. The Forward Scatter (FSC) and Side Scatter (SSC) profiles of the starting population of PBMC (“before Purification”) and after purification are displayed on the left. Staining of the purified population is displayed on the right, showing staining with isotype controls (upper plot), and with CD123 and BDCA-2 antibodies. pDC are identified as CD123+ BDCA-2+ cells.

Supplementary Figure 5:

**Activation of GEN cells by HIV and CpGB.**

GEN cells were left unstimulated, or stimulated by HIV or CpGB for 18 hours, after which their activation was measured by staining with CD83, CCR7, and CD86 antibodies. Percentages of cells in each quadrant are indicated.
